1 **High resolution dynamic mapping of the *C. elegans* intestinal brush border**

2

3

4

5

6 Aurélien Bidaud-Meynard<sup>1</sup>, Flora Demouchy<sup>1,2</sup>, Ophélie Nicolle<sup>1,2</sup>, Anne Pacquelet<sup>1,2</sup> and

7 Grégoire Michaux<sup>1,\*</sup>

8 <sup>1</sup>Univ Rennes, CNRS, IGDR (Institut de Génétique et Développement de Rennes) - UMR 6290,

9 F-35000 Rennes, France

10 <sup>2</sup>These authors contributed equally to this work

11

12

13 \*lead contact [gmichaux@univ-rennes1.fr](mailto:gmichaux@univ-rennes1.fr)

## 14 **Abstract**

15           The intestinal brush border is made of an array of microvilli that increases the membrane  
16 surface area for nutrient processing, absorption, and host defence. Studies on mammalian  
17 cultured epithelial cells uncovered some of the molecular players, structural components and  
18 physical constrains required to establish this apical specialized membrane. However, the  
19 building and maintenance of a brush border *in vivo* has not been investigated in detail yet. Here,  
20 we combined super-resolution imaging, transmission electron microscopy and genome editing  
21 in the developing nematode *C. elegans* to build a high-resolution and dynamic localization map  
22 of known and new markers of the brush border. Notably, we show that microvilli components  
23 are dynamically enriched at the apical membrane during microvilli outgrowth and maturation  
24 but become highly stable when microvilli are built. This new mapping tool will be instrumental  
25 to understand the molecular processes of microvilli growth and maintenance *in vivo* as well as  
26 the effect of genetic perturbations, notably in the context of disorders affecting the brush border  
27 integrity.

## 28 **Introduction**

29           The tremendous intestinal exchange surface required for efficient nutrient absorption is  
30 reached through three consecutive morphogenic processes in mammals: elongation of the  
31 intestinal tube, generation of villus protrusions and establishment of microvilli at the surface of  
32 each enterocyte, which together amplify the tube area nearly 100-times (Walton et al., 2016).  
33 Generation of microvilli in mammals occurs during enterocyte differentiation along the crypt-  
34 villus axis with the nucleation of actin filaments anchored on an F-actin- and intermediate  
35 filament-based terminal web. These core-actin bundles are then organized into a well-ordered  
36 and tightly packed array by various actin crosslinking and bundling factors, among which villin,  
37 espin and plastin1/fimbrin play a major role (Sauvanet et al., 2015). Recent studies in epithelial  
38 cell lines identified new functional players, such as IRTKS or myosin 1a/6/7b (Crawley et al.,  
39 2014a, Postema et al., 2018), and new mechanisms of brush border assembly and maintenance  
40 by intracellular trafficking (Vogel et al., 2015), microvilli motility, contraction and clustering  
41 (Meenderink et al., 2019, Chinowsky et al., 2020) or intermicrovillar protocadherin bridges  
42 (Crawley et al., 2014b). Additionally, recent use of live imaging revealed some of the key  
43 initiation and maturation steps of microvilli biogenesis in cell lines (Gaeta et al., 2021).

44           The intestine of the soil nematode *C. elegans* has been widely used as a *in vivo* model  
45 of intestinal luminogenesis, polarity, and host defence (Zhang et al., 2013, Zhang and Hou,  
46 2013, Sato et al., 2014, Shafaq-Zadah et al., 2012). The *C. elegans* intestine is composed of  
47 perennial intestinal epithelial cells, contrary to the ~3-5-days living mammalian enterocytes  
48 that arise from the proliferation of crypt based columnar stem cells (Walton et al., 2016,  
49 McGhee, 2007). Intestinal organogenesis in *C. elegans* encompasses cell division and  
50 intercalation steps from the E blastomere ancestor to form a primordium containing two rows  
51 of eight cells (E16 stage) which ends up, after a last round of division, with twenty cells  
52 arranged into nine rings (or *ints*) forming a ellipse-shaped tube that runs along the whole body

53 of the worm (Leung et al., 1999, Asan et al., 2016). Polarization of the intestinal cells begins at  
54 the two-tiered E16 stage with the enterocyte polarization, giving rise to a basolateral and an  
55 apical pole, later covered by microvilli, separated by the CeAJ junctional complex. Polarization,  
56 which encompasses cellular components relocalization and cell shape changes (Leung et al.,  
57 1999), relies on the recruitment of the polarity determinant PAR-3 at the apical membrane  
58 which recruits the other members of the apical PAR polarity complex (Achilleos et al., 2010)  
59 and plays a major role in intestinal function (Feldman and Priess, 2012, Sallee et al., 2021).  
60 Luminogenesis also occurs at the E16 stage with the formation of apical cavities at the midline  
61 that ultimately form a lumen, a process that probably involves vesicular trafficking (Leung et  
62 al., 1999). Despite the absence of villar protrusions, the apical aspect of *C. elegans* enterocytes  
63 displays a brush border that is structurally similar to that of mammals (Leung et al., 1999,  
64 Geisler et al., 2019, Bidaud-Meynard et al., 2019) and relies on some of the same structural  
65 components. Indeed, *C. elegans* microvilli are made of F-actin core bundles, notably the  
66 intestinal-specific isoform of actin *act-5*, whose depletion induces a circular lumen with sparse  
67 and defective microvilli (MacQueen et al., 2005). Several F-actin regulators have been shown  
68 to be essential for *C. elegans* microvilli integrity, such as *erm-1* (the ortholog of the member of  
69 the Ezrin/Radixin/Moesin family of F-actin plasma membrane crosslinkers ezrin) (Gobel et al.,  
70 2004, Van Furden et al., 2004) and the actin capping factor EPS-8 (Croce et al., 2004). As in  
71 mammals, these microvilli are anchored on a terminal web made of a network of F-actin and  
72 various intermediate filament isoforms (Bossinger et al., 2004), the latter forming an electron-  
73 dense belt named as endotube, in which IFB-2 seems to play a major role (Geisler et al., 2020).  
74 Hence, the structural and biochemical similarity with mammals make *C. elegans* an appropriate  
75 model to study the biogenesis of microvilli *in vivo*.

76 In that context, most of the studies in *C. elegans* focused on the polarized localization  
77 of markers and the fate of the brush border was only studied by Transmission Electron

78 Microscopy (TEM), which provides ultrastructural data but lacks the dynamics and whole organ  
79 context. Very recently, some studies, including our, started to use *in vivo* super-resolution  
80 microscopy to study the apical membrane of *C. elegans* intestinal cells (Bidaud-Meynard et al.,  
81 2019) and excretory canal (Khan et al., 2019). Here, we combined optimized super-resolution  
82 and quantitative live microscopy, TEM and fluorescence recovery after photobleaching to study  
83 the recruitment and dynamics of endogenously tagged markers during the establishment of the  
84 brush border *in vivo* in *C. elegans*.

85

## 86 **Results and discussion**

### 87 **TEM analysis of the brush border establishment in *C. elegans* developing embryo.**

88 To first characterize the development of the brush border *in vivo*, embryos and larvae at  
89 various developmental stages were analysed by TEM using an optimized method (Nicolle et  
90 al., 2015, Kolotuev et al., 2009). We observed that the intestinal lumen starts to open at the  
91 Comma stage and progressively expands to reach the renown elliptic shape in larvae (Fig. 1A-  
92 B). At the apical PM, the first microvilli-like membrane extensions were observed at the 1.5-  
93 fold stage and started to cover the apical pole, with a disorganized pattern, at the 2,5-fold stage,  
94 and finally formed a regular brush border from the 3-fold stage (Fig. 1A). Measurement of  
95 microvilli density, length and width allowed to determine two phases of brush border  
96 biogenesis: 1) an *initial assembly* phase (1.5-fold to 4-fold stage), where ~72% of the total  
97 microvilli are assembled *de novo* (Fig. 1C), and 2) a *maturation* phase (4-fold to adulthood),  
98 where assembled microvilli grow in length and width, in a stepwise and continuous manner,  
99 respectively (Figs 1A-E and S1A-C). This latter process also encompasses the growth of some  
100 microvilli to fill the virtual empty spaces left by intestinal surface expansion to reach the final  
101 brush border density (Fig. 1A, 4-fold). Finally, the brush border could be imaged transversally  
102 in adult worms (Fig. 1F), which allowed to measure the distance between microvilli edges and  
103 centres ( $76,0 \pm 1,1$  nm and  $203,2 \pm 2,0$  nm, respectively) (Fig. 1G).

### 104 **Dynamic recruitment of brush border components during *C. elegans* development.**

105 Expression profiling in mammalian enterocytes between the proliferative crypt and the  
106 terminally differentiated villus demonstrated a marked upregulation of actin-related  
107 cytoskeletal genes, including actin, ezrin, villin and espin (Chang et al., 2008, Mariadason et  
108 al., 2005). Notably, recent data in LLC-PK1 cells showed a stepwise recruitment of EPS8 and  
109 IRTKS before (initiation) and ezrin during (elongation) microvilli growth (Gaeta et al., 2021).  
110 We hypothesized that a set of brush border components may specifically be recruited at the

111 apical pole during brush border establishment *in vivo*. To test this, we performed a systematic  
112 analysis of the apical localization of endogenously tagged known brush border markers and  
113 putative new components, based on expression patterns as well as sequence or function  
114 homology with human proteins.

115 First, this led to the identification of two new structural components of *C. elegans*  
116 enterocytes apical membrane: i) PLST-1, the ortholog of plastin1/fimbrin (Figs 2A and S2),  
117 which is one of the major F-actin organizing factor in mammalian cells brush borders (Crawley  
118 et al., 2014a), together with ezrin, villin and espin. While the ortholog of villin seems not to be  
119 localized at the brush border (Hunt-Newbury et al., 2007) and espin does not have a *C. elegans*  
120 ortholog, PLST-1 has been involved in cortical contractility in *C. elegans* zygote (Ding et al.,  
121 2017) but has not been studied in the intestine yet; ii) FLN-2 (the ortholog of filamin A) (Figs  
122 2B and S2), a F-actin cross-linker that has been proposed to play a role in brush border  
123 maintenance in mammalian models but not in *C. elegans* (Zhou et al., 2014).

124 Second, most of the myosin classes have been localized to the brush border in  
125 mammalian cells where they play both a structural (e.g. MYO7b, MYH14) and trafficking (e.g.  
126 MYO-1a, -6) role (Chen et al., 2001, Heintzelman et al., 1994, Sauvanet et al., 2015, Houdusse  
127 and Titus, 2021). We found that a specific set of myosins accumulates at the enterocytes apex  
128 throughout *C. elegans* development: i) the unconventional heavy chain HUM-5 (the ortholog  
129 of human MYO1d/g) which is also localized at the lateral membrane, but not the other members  
130 of this class, HUM-1 and HUM-2 (Figs 2C, S2 and S3A-B); ii) the essential myosin light chain  
131 MLC-5 (Gally et al., 2009) (the ortholog of human MYL1/6) accumulated at the apical  
132 membrane of the enterocytes in both embryos and larvae, while MLC-4 was only weakly  
133 expressed in embryos (Figs 2D, S2 and S3C). Interestingly, we found that the non-muscle heavy  
134 chain myosins NMY-1 and NMY-2 (the orthologs of MYH9/10 and MYH10/14, respectively)  
135 (Fig. S3D-E), did not, or only very weakly for NMY-1, accumulate at the apical pole, which

136 suggests that myosin-dependent contractility may be less crucial for microvilli assembly in *C.*  
137 *elegans* than in mammals (Chinowsky et al., 2020). Furthermore, we have not investigated the  
138 presence of intermicrovillar bridges molecules, such as protocadherin complexes (Crawley et  
139 al., 2014b), despite a putative hexagonal arrangement of microvilli (Figs 1F and 3D). These  
140 results suggest species-specific mechanisms or compensation between myosins, as shown  
141 before (Houdusse and Titus, 2021), and the need for systematic approaches to better  
142 characterize the conserved components of brush borders.

143 To quantitatively assess the expression of these apically enriched factors during brush  
144 border establishment, we used photon counting detectors and quantified the absolute apical  
145 signal of endogenously tagged proteins at all *C. elegans* developmental stages (Fig. 2K, S2,  
146 S3F). Notably, we observed that a set of markers was already localized at the apical PM at the  
147 lima bean stage, before microvilli onset as observe by TEM: ERM-1, FLN-2, PLST-1, ACT-5  
148 (note that ACT-5 was exogenously expressed under its own promoter, because of the embryonic  
149 lethality of endogenously tagged strains), and the intermediate filament IFB-2 (Figs 2E-J and  
150 S2). Then, we observed that the apical localization of these markers, as well as that of EPS-8,  
151 HUM-5 and MLC-5, dramatically increased concomitantly with microvilli assembly (from the  
152 1,5-fold stage), most of them peaked between the 4-fold and L1 stages and then decreased until  
153 adulthood (Fig. 2K-S and S2). The early accumulation of the cytoskeletal protein ERM-1 and  
154 ACT-5 mirrors their requirement for microvilli assembly (Gobel et al., 2004, MacQueen et al.,  
155 2005), and the direct relationship between G-actin apical availability and microvilli growth  
156 (Faust et al., 2019). As PLST-1 also accumulated before microvilli onset, it could also play a  
157 role in microvilli initial assembly *in vivo*, which is coherent with the disorganized terminal web  
158 and microvilli rootlets described in *Pls1* knockout mice (Grimm-Gunter et al., 2009). Its relative  
159 but specific disappearance only at the comma stage might suggest that this stage corresponds  
160 to a specific time just before the formation of the first microvilli. Interestingly, we observed



161 that FLN-2 displayed a shifted pattern, with an earlier apical accumulation that may suggest a  
162 specific role in microvilli establishment that needs to be analysed in detail. Thus, as in  
163 mammalian cells (Gaeta et al., 2021), *C. elegans* microvilli assembly might rely on an *initiation*  
164 *complex*, composed, at least, of ERM-1, ACT-5, PLST-1, FLN-2 and IFB-2, and an  
165 *elongation/maturation complex*, composed additionally of the actin polymerization/severing  
166 agent EPS-8, HUM-5 and MLC-5 (Fig. S5B).

### 167 **Super-resolution imaging of the brush border *in vivo***

168 To visualize the precise localization of brush border markers, we first developed an  
169 imaging set up that would allow to resolve individual microvilli (~100 nm interspaced, ~120  
170 nm wide, Fig. 1E, G). According to the Rayleigh criterion ( $R_{fluo} = \frac{1.22\lambda}{2xNA}$ ), the optical axial  
171 resolution of the 405, 488 and 561 nm lasers is theoretically of 176.5, 212.6 and 244.4 nm,  
172 respectively. To test this theoretical resolution *in vivo*, we inserted by CRISPR-CAS9 three  
173 different tags at the C-terminal end of the brush border-specific factor ERM-1: Blue Fluorescent  
174 Protein (mTagBFP2/BFP,  $\lambda_{Ex}$  381 nm/ $\lambda_{Em}$  445 nm), mNeongreen (mNG,  $\lambda_{Ex}$  506 nm/ $\lambda_{Em}$  517  
175 nm) (Shaner et al., 2013) and wrmScarlet (wSc,  $\lambda_{Ex}$  569 nm/ $\lambda_{Em}$  593 nm) (El Mouridi et al.,  
176 2017) and imaged them with a multi-detector and deconvolution-based super-resolution  
177 imaging system (see methods). We could easily visualize the regular alignment of microvilli  
178 with BFP and mNG tags, but it was less visible with the wSc fluorophore (Fig. 3A-B). In  
179 addition to individual microvilli, we could also precisely localize brush border markers along  
180 the microvilli long axis. Indeed, while ERM-1 covered the whole microvilli length, the chloride  
181 intracellular channel 2 (CLIC-2) ortholog EXL-1 (Liang et al., 2017) and the P-GlycoProtein  
182 related transporter PGP-1 (Broeks et al., 1995), accumulated at the tip and the base of the  
183 microvilli, respectively (Fig. 3C) (Bidaud-Meynard et al., 2019). Of note, this method allowed  
184 to uncover small localization differences between in locus mNG-tagged and overexpressed  
185 GFP-tagged proteins (compare Figs 3C and S4A). Individual microvilli were similarly

186 visualized using Random Illumination Microscopy (Mangeat et al., 2021), but not using  
187 conventional confocal imaging or Stimulated-emission-depletion (STED) microscopes,  
188 probably because of the depth of the intestine inside the nematode body (~15µm) (Figs 3C and  
189 S4B). The brush border could also be imaged transversally (compare Fig. 3D and 1F). Hence,  
190 the combination of a specific super-resolution imaging system and appropriate fluorophores  
191 allows the precise visualization of microvilli *in vivo* in *C. elegans* intestine.

192 We then used this new tool to study the (co)localization of known and newly identified  
193 apical markers in adult worms, as we have done before for ERM-1 and ACT-5 (Bidaud-  
194 Meynard et al., 2019). Using a strain co-expressing endogenously tagged versions of the three  
195 classical microvilli markers ERM-1, EPS-8 and IFB-2, we observed that ERM-1 localized  
196 along the whole microvilli but not in the terminal web (Fig. 3E). EPS-8 accumulated at the tip  
197 of the microvilli, where it partially colocalized with ERM-1, and was also found marginally at  
198 the terminal web vicinity, as observed before by immuno-EM (Croce et al., 2004) (Fig. 3E).  
199 Finally, we could resolve in some worms the tiny difference between ACT-5, which localized  
200 along and at the basis of the microvilli, and the endotube marker IFB-2 (Geisler et al., 2019,  
201 Bossinger et al., 2004), with which it composes the terminal web (Fig. S4C).

202 Notably, we found that PLST-1 localized at the bottom of the microvilli (Fig. 3F), with  
203 a dotted pattern different from the linear terminal web pattern (Figs 3E). This localization is  
204 consistent with that of Plastin-1 in mouse jejunum sections and its proposed role in anchoring  
205 microvillar actin rootlets to the terminal web (Grimm-Gunter et al., 2009). While FLN-2 was  
206 hardly detectable in adult worms, we observed in L1 larvae that FLN-2 localized at the basis of  
207 microvilli (Fig. 3G), alike MLC-5 (Fig. 3H). Finally, we found that HUM-5 localized both at  
208 the basis and the tip of microvilli (Fig. 3I), a similar pattern to that described in mouse intestine  
209 (Benesh et al., 2010). Thus, our novel methodology allowed to visualize *in vivo* the expression

210 and the precise localization of several proteins of the brush border including structural and  
211 trafficking factors as well as molecular motors.

212 Since factors needed to build the microvilli are concomitantly recruited to the apical  
213 pole (Fig. 2), we finally asked whether super-resolution imaging could resolve the change in  
214 their relative microvillar position during brush border assembly. Line scans showed that ERM-  
215 1, EPS-8 and IFB-2 colocalized at the beginning of microvilli assembly (2-fold stage) and  
216 progressively moved away to end up with IFB-2 and EPS-8 contralaterally positioned and  
217 surrounding ERM-1 (Figs 3J-K and S4D).

### 218 **Analysis of brush border markers dynamics during microvilli assembly**

219 The progressive accumulation of brush border components at the apical PM implies a  
220 dynamic behaviour during microvilli building (Fig. 2K), consistent with the intense actin  
221 treadmilling (half-time recovery of ezrin of ~30 s) in immature microvilli from non-polarized  
222 cells models (Garbett and Bretscher, 2012). However, their decreased apical expression after  
223 the L1 larval stage may reflect a high stability of mature brush borders, as also proposed  
224 recently *in vivo* in adult worms (Ramalho et al., 2020, Rimmelzwaal et al., 2021), and which  
225 would explain their uniform length and highly ordered organisation in the human intestine  
226 (Crawley et al., 2014a). To test this conjecture, we analysed the dynamics of ERM-1 during  
227 and after the establishment of the brush border using *fluorescence recovery after*  
228 *photobleaching* (FRAP) experiments. While ERM-1 was very dynamic during microvilli  
229 assembly (1,5-fold embryo) it became surprisingly very stable in established brush border (adult  
230 worm), with little recovery even after >15 minutes (Figs 4A and S5A). Systematic analysis of  
231 ERM-1 fluorescence recovery throughout *C. elegans* development confirmed that ERM-1  
232 dynamics progressively decreased concomitantly with brush border assembly and became  
233 almost static in larvae and adults (Fig. 4B, F). To confirm this, the dynamics of other structural  
234 components of the brush border was analysed during microvilli initial assembly (Comma/1,5-

235 fold), maturation (L1 larvae) and in adult worms; note that due to embryo fast movements from  
236 the 2-fold stage to the end of embryogenesis, these developmental stages could not be  
237 investigated. Like ERM-1, EPS-8 was also very dynamic during microvilli assembly but  
238 became very stable in maturing and mature microvilli (Fig. 4C, F). ACT-5 also displayed a  
239 dynamic, albeit of a lower extent, behaviour, that persisted until L1 larvae (Fig. 3D, F), which  
240 is in the range of microvillar actin mobile fractions in Caco-2 cells (~60%) (Waharte et al.,  
241 2005), to finally become stable at adulthood. Conversely, the intermediate filament IFB-2  
242 displayed a more stable behaviour at every developmental stage, which reflects its anchoring  
243 role for growing microvilli (Grimm-Gunter et al., 2009, Geisler et al., 2019).

244 Thus, these results enlightened that mature microvilli adopt a stable steady state *in vivo*,  
245 which is consistent with the notion that microvilli might be considered more as stereocilia than  
246 evanescent F-actin-based structures like filopodia. The maturation status of the brush border  
247 might be a key consideration that would help to reconcile conflicting data of the literature,  
248 where probably immature microvilli in non-polarized cells seem to be more dynamic, i.e. life-  
249 cycle of ~12 min in A6 cells (Gorelik et al., 2003) but which were found to last up to 12 h in  
250 mature brush borders (Meenderink et al., 2019).

251 In conclusion, this new multi-imaging approach allowed to image the precise  
252 localization of brush border markers at the microvilli level *in vivo* and to study the dynamic  
253 recruitment of microvilli components during the development of the brush border. This new  
254 methodology will be instrumental to address the many questions remaining to understand  
255 microvilli assembly and maturation, notably on the full set of factors required for microvilli  
256 growth and maintenance, the principles that govern microvilli size, packing and organization  
257 or the motility of microvilli *in vivo*. It will be also instrumental to understand the  
258 pathophysiology of diseases affecting the brush border, such as Microvillus inclusions disease

259 (Bidaud-Meynard et al., 2019), Crohn's (VanDussen et al., 2018) and celiac (Tye-Din and  
260 Anderson, 2008) diseases or pathogen infections (Scott et al., 2004, Lauwaet et al., 2004).

## 261 **Materials and methods**

### 262 *C. elegans* strains and maintenance

263 Strains were maintained under typical conditions as described (Brenner, 1974). CRISPR-  
264 CAS9-genome edited mTagBFP2, mNeonGreen and mScarlet-tagged proteins were generated  
265 at the « Biologie de *Cænorhabditis elegans* » facility (Universite Lyon 1, UMS3421, Lyon,  
266 France). The strains used in this study are listed in Table S1.

### 267 *in vivo* confocal imaging in *C. elegans*

268 For *in vivo* imaging, *C. elegans* larvae were mounted on a 10% agarose pad in a solution of 100  
269 nm polystyrene microbeads (Polysciences Inc.) to stop worm movement. Embryos were  
270 mounted on a 2% agarose pad with a mix of bacteria and M9 medium (localization) or M9 only  
271 (live imaging). Single confocal slices of the anterior intestinal cells or stacks were performed  
272 on adults/larvae and whole embryos, respectively, using a Leica SP8 (Wetzlar, Germany)  
273 equipped with a 63X, 1.4 NA objective (LAS AF software) or a super-resolution Zeiss  
274 LSM880-Airyscan (Oberkochen, Germany) equipped with a 63X, 1.4 NA objective (Zen Black  
275 software). Quantitative recording of the apical localization of brush border markers was  
276 performed on the Leica SP8 microscope using the photon counting function of HyD hybrid  
277 detectors and image accumulation process (Fig. S3). For embryos, stacks were reconstructed  
278 using the max intensity Z-projection function of Fiji software (<https://imagej.net/Fiji>). All  
279 images were examined using Fiji software. Random Illumination Microscopy was performed  
280 at the LITC Core Facility, Centre de Biologie Integrative, Université de Toulouse, France, using  
281 the workflow recently published on ERM-1::GFP expressing strains (Mangeat et al., 2021).

### 282 **TEM**

283 Samples were subjected to high-pressure freezing followed by freeze substitution, flat  
284 embedding, targeting, and sectioning using the positional correlation and tight trimming  
285 approach, as described previously (Bidaud-Meynard et al., 2019). Each embryo or larva was

286 sectioned in 5-10 different places, every 5-7  $\mu\text{m}$ , to ensure that different intestinal cells were  
287 observed. Ultrathin sections (60-70 nm) were collected on formvar-coated slot grids (FCF2010-  
288 CU, EMS) and observed using a JEM-1400 transmission electron microscope (JEOL, Tokyo,  
289 Japan) operated at 120 kV, equipped with a Gatan Orius SC 1000 camera (Gatan, Pleasanton,  
290 USA) and piloted by the Digital Micrograph program.

### 291 **Fluorescence recovery after photobleaching (FRAP)**

292 FRAP experiments were performed using the Zeiss LSM880-Airyscan on a rectangle ROI of  
293 120 px width crossing the apical PM with 100% 488 nm laser power, 10-20 iterations and  
294 recovery was measured every 30 s for 10 to 15 min. Post-FRAP images were analysed using  
295 Fiji software. The mean fluorescence intensity of the bleached ROI was normalized for  
296 photobleaching by recording the intensity of the same ROI on a non-bleached region and  
297 cytoplasmic background was subtracted on each frame. Finally, the % recovery was calculated  
298 on each timeframe by comparing the normalized signal intensities with the mean of two  
299 timepoints before bleach. Curve fitting was performed with one-phase association non-linear  
300 regression analysis using Graphpad Prism 9 software. The mobile fraction was calculated using  
301 EasyFRAP software (<https://easyfrap.vmnnet.upatras.gr/?AspxAutoDetectCookieSupport=1>).

### 302 **Quantification**

303 Micrographs were analysed using Fiji software and were representative of all the  
304 sections observed. Microvilli (length, width, density) and lumen perimeter were quantified on  
305 at least 6-13 TEM images per sample ( $n \geq 3$ , by developmental stage).

306 For the quantitative measurement of the apical localization of brush border markers, a  
307 maximum intensity projection was performed using Fiji, and the signal density was quantified  
308 by measuring the mean fluorescence signal along a segmented line covering the whole intestine  
309 (E16 to 2-fold embryos) or visible part of the anterior intestine (3-fold to adults). The signal

310 measured was then corrected for fluorescence accumulation and normalized for the highest  
311 expression level during development.

### 312 **Statistical analysis**

313 Results are presented as mean  $\pm$  SEM, as indicated in Figure captions, of the number of  
314 independent experiments indicated in the legends, and scattered dots represent individual  
315 worms. p-values were calculated by two-tailed unpaired student's t-test or one-way ANOVA,  
316 and a 95% confidence level was considered significant. Normal distribution of data and  
317 homogeneity of variances were validated using the Shapiro-Wilk and the F-test, respectively.  
318 Mann-Whitney U-test was used for calculating the P-values of non-normal distributions, and  
319 Welch correction was applied to normal distributions with non-homogenous variances.



## 320 **Acknowledgements**

321 We thank Marc Tramier and Stéphanie Dutertre for their advice on fluorescence quantification  
322 and super-resolution imaging, respectively, as well as Matis Soleilhac for the initial analysis of  
323 expression patterns. We also thank Michel Labouesse, Junho Lee, François Robin and Ronen  
324 Zaidel-Bar for strains as well as Céline Burcklé and Guillaume Halet for helpful discussions.  
325 Some strains were provided by the CGC, which is funded by NIH Office of research  
326 Infrastructure Programs (P40 OD010440; University of Minnesota, USA). We are grateful to  
327 Maité Carre-Pierrat who performed CRISPR-CAS9 endogenous tagging at the Biology of  
328 *Caenorhabditis elegans* Facility, Université Lyon 1, UMS3421, France. Imaging was performed  
329 at the photonic and electron microscopy facilities of the Microscopy Rennes imaging Center  
330 (MRiC), member of the national infrastructure France-BioImaging supported by the French  
331 National Research Agency (ANR-10-INBS-04).

332

## 333 **Funding**

334 This work was supported by the European Union's Horizon 2020 research and innovation  
335 program under the Marie Skłodowska-Curie grant agreement 844070 to ABM, Défis  
336 scientifiques de l'Université Rennes 1 (17CQ436-S0) to ABM and GM, Ligue Régionale  
337 Contre le Cancer (22, 29, 35, 41, 72, 85) and the Fondation maladies rares (169608) to GM.  
338 GM laboratory also received institutional funding from the CNRS and the Université de Rennes  
339 1.

340

## 341 **Authors contribution**

342 Conceptualization: A.B.M., G.M.; Methodology: A.B.M., F.D., O.N., A.P., G.M.; Validation:  
343 A.B.M., F.D., O.N., A.P., G.M.; Formal analysis: A.B.M., F.D., O.N., A.P., G.M.;  
344 Investigation: A.B.M., F.D., O.N., A.P., G.M.; Data curation: A.B.M., F.D., O.N., A.P., G.M.;

345 Writing - original draft: A.B.M.; Writing - review & editing: A.B.M., F.D., O.N., A.P., G.M.;

346 Visualization: A.B.M., F.D., O.N., A.P, G.M.; Supervision: G.M.; Project administration:

347 G.M.; Funding acquisition: A.B.M., G.M.

348

349 **Conflict of interest**

350 The authors declare no conflict of interest.

## 351 **References**

- 352 ACHILLEOS, A., WEHMAN, A. M. & NANCE, J. 2010. PAR-3 mediates the initial clustering and apical  
353 localization of junction and polarity proteins during *C. elegans* intestinal epithelial cell  
354 polarization. *Development*, 137, 1833-42.
- 355 ASAN, A., RAIDERS, S. A. & PRIESS, J. R. 2016. Morphogenesis of the *C. elegans* Intestine Involves  
356 Axon Guidance Genes. *PLoS Genet*, 12, e1005950.
- 357 BENESH, A. E., NAMBIAR, R., MCCONNELL, R. E., MAO, S., TABB, D. L. & TYSKA, M. J. 2010. Differential  
358 localization and dynamics of class I myosins in the enterocyte microvillus. *Mol Biol Cell*, 21,  
359 970-8.
- 360 BIDAUD-MEYNARD, A., NICOLLE, O., HECK, M., LE CUNFF, Y. & MICHAUX, G. 2019. A V0-ATPase-  
361 dependent apical trafficking pathway maintains the polarity of the intestinal absorptive  
362 membrane. *Development*, 146.
- 363 BOSSINGER, O., FUKUSHIGE, T., CLAEYS, M., BORGONIE, G. & MCGHEE, J. D. 2004. The apical  
364 disposition of the *Caenorhabditis elegans* intestinal terminal web is maintained by LET-413.  
365 *Dev Biol*, 268, 448-56.
- 366 BRENNER, S. 1974. The genetics of *Caenorhabditis elegans*. *Genetics*, 77, 71-94.
- 367 BROEKS, A., JANSSEN, H. W., CALAFAT, J. & PLASTERK, R. H. 1995. A P-glycoprotein protects  
368 *Caenorhabditis elegans* against natural toxins. *EMBO J*, 14, 1858-66.
- 369 CHANG, J., CHANCE, M. R., NICHOLAS, C., AHMED, N., GUILMEAU, S., FLANDEZ, M., WANG, D., BYUN,  
370 D. S., NASSER, S., ALBANESE, J. M., CORNER, G. A., HEERDT, B. G., WILSON, A. J.,  
371 AUGENLICHT, L. H. & MARIADASON, J. M. 2008. Proteomic changes during intestinal cell  
372 maturation in vivo. *J Proteomics*, 71, 530-46.
- 373 CHEN, Z. Y., HASSON, T., ZHANG, D. S., SCHWENDER, B. J., DERFLER, B. H., MOOSEKER, M. S. &  
374 COREY, D. P. 2001. Myosin-VIIIb, a novel unconventional myosin, is a constituent of microvilli  
375 in transporting epithelia. *Genomics*, 72, 285-96.
- 376 CHINOWSKY, C. R., PINETTE, J. A., MEENDERINK, L. M., LAU, K. S. & TYSKA, M. J. 2020. Nonmuscle  
377 myosin-2 contractility-dependent actin turnover limits the length of epithelial microvilli. *Mol*  
378 *Biol Cell*, 31, 2803-2815.
- 379 CRAWLEY, S. W., MOOSEKER, M. S. & TYSKA, M. J. 2014a. Shaping the intestinal brush border. *J Cell*  
380 *Biol*, 207, 441-51.
- 381 CRAWLEY, S. W., SHIFRIN, D. A., JR., GREGA-LARSON, N. E., MCCONNELL, R. E., BENESH, A. E., MAO,  
382 S., ZHENG, Y., ZHENG, Q. Y., NAM, K. T., MILLIS, B. A., KACHAR, B. & TYSKA, M. J. 2014b.  
383 Intestinal brush border assembly driven by protocadherin-based intermicrovillar adhesion.  
384 *Cell*, 157, 433-446.
- 385 CROCE, A., CASSATA, G., DISANZA, A., GAGLIANI, M. C., TACCHETTI, C., MALABARBA, M. G., CARLIER,  
386 M. F., SCITA, G., BAUMEISTER, R. & DI FIORE, P. P. 2004. A novel actin barbed-end-capping  
387 activity in EPS-8 regulates apical morphogenesis in intestinal cells of *Caenorhabditis elegans*.  
388 *Nat Cell Biol*, 6, 1173-9.
- 389 DING, W. Y., ONG, H. T., HARA, Y., WONGSANTICHON, J., TOYAMA, Y., ROBINSON, R. C., NEDELEC, F.  
390 & ZAIDEL-BAR, R. 2017. Plastin increases cortical connectivity to facilitate robust polarization  
391 and timely cytokinesis. *J Cell Biol*, 216, 1371-1386.

- 392 EL MOURIDI, S., LECROISEY, C., TARDY, P., MERCIER, M., LECLERCQ-BLONDEL, A., ZARIOHI, N. &  
393 BOULIN, T. 2017. Reliable CRISPR/Cas9 Genome Engineering in *Caenorhabditis elegans* Using  
394 a Single Efficient sgRNA and an Easily Recognizable Phenotype. *G3 (Bethesda)*, 7, 1429-1437.
- 395 FAUST, J. J., MILLIS, B. A. & TYSKA, M. J. 2019. Profilin-Mediated Actin Allocation Regulates the  
396 Growth of Epithelial Microvilli. *Curr Biol*, 29, 3457-3465 e3.
- 397 FELDMAN, J. L. & PRIESS, J. R. 2012. A role for the centrosome and PAR-3 in the hand-off of MTOC  
398 function during epithelial polarization. *Curr Biol*, 22, 575-82.
- 399 GAETA, I. M., MEENDERINK, L. M., POSTEMA, M. M., CENCER, C. S. & TYSKA, M. J. 2021. Direct  
400 visualization of epithelial microvilli biogenesis. *Curr Biol*.
- 401 GALLY, C., WISSLER, F., ZAHREDDINE, H., QUINTIN, S., LANDMANN, F. & LABOUESSE, M. 2009. Myosin  
402 II regulation during *C. elegans* embryonic elongation: LET-502/ROCK, MRCK-1 and PAK-1,  
403 three kinases with different roles. *Development*, 136, 3109-19.
- 404 GARBETT, D. & BRETSCHER, A. 2012. PDZ interactions regulate rapid turnover of the scaffolding  
405 protein EBP50 in microvilli. *J Cell Biol*, 198, 195-203.
- 406 GEISLER, F., COCH, R. A., RICHARDSON, C., GOLDBERG, M., BEVILACQUA, C., PREVEDEL, R. & LEUBE,  
407 R. E. 2020. Intestinal intermediate filament polypeptides in *C. elegans*: Common and isotype-  
408 specific contributions to intestinal ultrastructure and function. *Sci Rep*, 10, 3142.
- 409 GEISLER, F., COCH, R. A., RICHARDSON, C., GOLDBERG, M., DENECKE, B., BOSSINGER, O. & LEUBE, R.  
410 E. 2019. The intestinal intermediate filament network responds to and protects against  
411 microbial insults and toxins. *Development*, 146.
- 412 GOBEL, V., BARRETT, P. L., HALL, D. H. & FLEMING, J. T. 2004. Lumen morphogenesis in *C. elegans*  
413 requires the membrane-cytoskeleton linker erm-1. *Dev Cell*, 6, 865-73.
- 414 GORELIK, J., SHEVCHUK, A. I., FROLENKOV, G. I., DIAKONOV, I. A., LAB, M. J., KROS, C. J.,  
415 RICHARDSON, G. P., VODYANOY, I., EDWARDS, C. R., KLENERMAN, D. & KORCHEV, Y. E. 2003.  
416 Dynamic assembly of surface structures in living cells. *Proc Natl Acad Sci U S A*, 100, 5819-22.
- 417 GRIMM-GUNTER, E. M., REVENU, C., RAMOS, S., HURBAIN, I., SMYTH, N., FERRARY, E., LOUVARD, D.,  
418 ROBINE, S. & RIVERO, F. 2009. Plastin 1 binds to keratin and is required for terminal web  
419 assembly in the intestinal epithelium. *Mol Biol Cell*, 20, 2549-62.
- 420 HEINTZELMAN, M. B., HASSON, T. & MOOSEKER, M. S. 1994. Multiple unconventional myosin  
421 domains of the intestinal brush border cytoskeleton. *J Cell Sci*, 107 ( Pt 12), 3535-43.
- 422 HOUDUSSE, A. & TITUS, M. A. 2021. The many roles of myosins in filopodia, microvilli and stereocilia.  
423 *Curr Biol*, 31, R586-R602.
- 424 HUNT-NEWBURY, R., VIVEIROS, R., JOHNSEN, R., MAH, A., ANASTAS, D., FANG, L., HALFNIGHT, E.,  
425 LEE, D., LIN, J., LORCH, A., MCKAY, S., OKADA, H. M., PAN, J., SCHULZ, A. K., TU, D., WONG, K.,  
426 ZHAO, Z., ALEXEYENKO, A., BURGLIN, T., SONNHAMMER, E., SCHNABEL, R., JONES, S. J.,  
427 MARRA, M. A., BAILLIE, D. L. & MOERMAN, D. G. 2007. High-throughput in vivo analysis of  
428 gene expression in *Caenorhabditis elegans*. *PLoS Biol*, 5, e237.
- 429 KHAN, L. A., JAFARI, G., ZHANG, N., MEMBRENO, E., YAN, S., ZHANG, H. & GOBEL, V. 2019. A tensile  
430 trilayered cytoskeletal endotube drives capillary-like lumenogenesis. *J Cell Biol*, 218, 2403-  
431 2424.
- 432 KOLOTUEV, I., SCHWAB, Y. & LABOUESSE, M. 2009. A precise and rapid mapping protocol for  
433 correlative light and electron microscopy of small invertebrate organisms. *Biol Cell*, 102, 121-  
434 32.

- 435 LAUWAET, T., OLIVEIRA, M. J., CALLEWAERT, B., DE BRUYNE, G., MAREEL, M. & LEROY, A. 2004.  
436 Proteinase inhibitors TPCK and TLCK prevent *Entamoeba histolytica* induced disturbance of  
437 tight junctions and microvilli in enteric cell layers in vitro. *Int J Parasitol*, 34, 785-94.
- 438 LEUNG, B., HERMANN, G. J. & PRIESS, J. R. 1999. Organogenesis of the *Caenorhabditis elegans*  
439 intestine. *Dev Biol*, 216, 114-34.
- 440 LIANG, J., SHAULOV, Y., SAVAGE-DUNN, C., BOISSINOT, S. & HOQUE, T. 2017. Chloride intracellular  
441 channel proteins respond to heat stress in *Caenorhabditis elegans*. *PLoS One*, 12, e0184308.
- 442 MACQUEEN, A. J., BAGGETT, J. J., PERUMOV, N., BAUER, R. A., JANUSZEWSKI, T., SCHRIEFER, L. &  
443 WADDLE, J. A. 2005. ACT-5 is an essential *Caenorhabditis elegans* actin required for intestinal  
444 microvilli formation. *Mol Biol Cell*, 16, 3247-59.
- 445 MANGEAT, T., LABOUESSE, S., ALLAIN, M., NEGASH, A., MARTIN, E., GUÉNOLÉ, A., POINCLOUX, R.,  
446 ESTIBAL, C., BOUISSOU, A., CANTALOUBE, S., VEGA, E., LI, T., TROUVIÈRE, C., ALLART, S.,  
447 KELLER, D., DEBARNOT, V., WANG, X. B., MICHAUX, G., PINOT, M., LE BORGNE, R., TOURNIER,  
448 S., SUZANNE, M., IDIER, J. & SENTENAC, A. 2021. Super-resolved live-cell imaging using  
449 random illumination microscopy. *Cell Reports Methods*, 1.
- 450 MARIADASON, J. M., NICHOLAS, C., L'ITALIEN, K. E., ZHUANG, M., SMARTT, H. J., HEERDT, B. G.,  
451 YANG, W., CORNER, G. A., WILSON, A. J., KLAMPFER, L., ARANGO, D. & AUGENLICHT, L. H.  
452 2005. Gene expression profiling of intestinal epithelial cell maturation along the crypt-villus  
453 axis. *Gastroenterology*, 128, 1081-8.
- 454 MCGHEE, J. D. 2007. The *C. elegans* intestine. *WormBook*, 1-36.
- 455 MEENDERINK, L. M., GAETA, I. M., POSTEMA, M. M., CENCER, C. S., CHINOWSKY, C. R., KRYSIOFIK,  
456 E. S., MILLIS, B. A. & TYSKA, M. J. 2019. Actin Dynamics Drive Microvillar Motility and  
457 Clustering during Brush Border Assembly. *Dev Cell*, 50, 545-556 e4.
- 458 NICOLLE, O., BUREL, A., GRIFFITHS, G., MICHAUX, G. & KOLOTUEV, I. 2015. Adaptation of Cryo-  
459 Sectioning for IEM Labeling of Asymmetric Samples: A Study Using *Caenorhabditis elegans*.  
460 *Traffic*, 16, 893-905.
- 461 POSTEMA, M. M., GREGA-LARSON, N. E., NEININGER, A. C. & TYSKA, M. J. 2018. IRTKS (BAIAP2L1)  
462 Elongates Epithelial Microvilli Using EPS8-Dependent and Independent Mechanisms. *Curr*  
463 *Biol*, 28, 2876-2888 e4.
- 464 RAMALHO, J. J., SEPERS, J. J., NICOLLE, O., SCHMIDT, R., CRAVO, J., MICHAUX, G. & BOXEM, M. 2020.  
465 C-terminal phosphorylation modulates ERM-1 localization and dynamics to control cortical  
466 actin organization and support lumen formation during *Caenorhabditis elegans*  
467 development. *Development*, 147.
- 468 REMMELZWAAL, S., GEISLER, F., STUCCHI, R., VAN DER HORST, S., PASOLLI, M., KROLL, J. R.,  
469 JAROSINSKA, O. D., AKHMANOVA, A., RICHARDSON, C. A., ALTELAAR, M., LEUBE, R. E.,  
470 RAMALHO, J. J. & BOXEM, M. 2021. BBLN-1 is essential for intermediate filament  
471 organization and apical membrane morphology. *Curr Biol*.
- 472 SALLEE, M. D., PICKETT, M. A. & FELDMAN, J. L. 2021. Apical PAR complex proteins protect against  
473 epithelial assaults to create a continuous and functional intestinal lumen. *BioRxiv*,  
474 <https://doi.org/10.1101/2020.10.28.359299>.
- 475 SATO, K., NORRIS, A., SATO, M. & GRANT, B. D. 2014. *C. elegans* as a model for membrane traffic.  
476 *WormBook*, 1-47.

- 477 SAUVANET, C., WAYT, J., PELASEYED, T. & BRETSCHER, A. 2015. Structure, regulation, and functional  
478 diversity of microvilli on the apical domain of epithelial cells. *Annu Rev Cell Dev Biol*, 31, 593-  
479 621.
- 480 SCOTT, K. G., YU, L. C. & BURET, A. G. 2004. Role of CD8+ and CD4+ T lymphocytes in jejunal mucosal  
481 injury during murine giardiasis. *Infect Immun*, 72, 3536-42.
- 482 SHAFQAQ-ZADAH, M., BROCARD, L., SOLARI, F. & MICHAUX, G. 2012. AP-1 is required for the  
483 maintenance of apico-basal polarity in the *C. elegans* intestine. *Development*, 139, 2061-70.
- 484 SHANER, N. C., LAMBERT, G. G., CHAMMAS, A., NI, Y., CRANFILL, P. J., BAIRD, M. A., SELL, B. R.,  
485 ALLEN, J. R., DAY, R. N., ISRAELSSON, M., DAVIDSON, M. W. & WANG, J. 2013. A bright  
486 monomeric green fluorescent protein derived from *Branchiostoma lanceolatum*. *Nat*  
487 *Methods*, 10, 407-9.
- 488 TYE-DIN, J. & ANDERSON, R. 2008. Immunopathogenesis of celiac disease. *Curr Gastroenterol Rep*,  
489 10, 458-65.
- 490 VAN FURDEN, D., JOHNSON, K., SEGBERT, C. & BOSSINGER, O. 2004. The *C. elegans* ezrin-radixin-  
491 moesin protein ERM-1 is necessary for apical junction remodelling and tubulogenesis in the  
492 intestine. *Dev Biol*, 272, 262-76.
- 493 VANDUSSEN, K. L., STOJMIROVIC, A., LI, K., LIU, T. C., KIMES, P. K., MUEGGE, B. D., SIMPSON, K. F.,  
494 CIORBA, M. A., PERRIGOUÉ, J. G., FRIEDMAN, J. R., TOWNE, J. E., HEAD, R. D. &  
495 STAPPENBECK, T. S. 2018. Abnormal Small Intestinal Epithelial Microvilli in Patients With  
496 Crohn's Disease. *Gastroenterology*, 155, 815-828.
- 497 VOGEL, G. F., KLEE, K. M., JANECKE, A. R., MULLER, T., HESS, M. W. & HUBER, L. A. 2015. Cargo-  
498 selective apical exocytosis in epithelial cells is conducted by Myo5B, Slp4a, Vamp7, and  
499 Syntaxin 3. *J Cell Biol*, 211, 587-604.
- 500 WAHARTE, F., BROWN, C. M., COSCOY, S., COUDRIER, E. & AMBLARD, F. 2005. A two-photon FRAP  
501 analysis of the cytoskeleton dynamics in the microvilli of intestinal cells. *Biophys J*, 88, 1467-  
502 78.
- 503 WALTON, K. D., FREDDO, A. M., WANG, S. & GUMUCIO, D. L. 2016. Generation of intestinal surface:  
504 an absorbing tale. *Development*, 143, 2261-72.
- 505 ZHANG, H., KIM, A., ABRAHAM, N., KHAN, L. A. & GOBEL, V. 2013. Vesicular sorting controls the  
506 polarity of expanding membranes in the *C. elegans* intestine. *Worm*, 2, e23702.
- 507 ZHANG, R. & HOU, A. 2013. Host-Microbe Interactions in *Caenorhabditis elegans*. *ISRN Microbiol*,  
508 2013, 356451.
- 509 ZHOU, X., MASSOL, R. H., NAKAMURA, F., CHEN, X., GEWURZ, B. E., DAVIS, B. M., LENCER, W. I. &  
510 WALDOR, M. K. 2014. Remodeling of the intestinal brush border underlies adhesion and  
511 virulence of an enteric pathogen. *mBio*, 5.

512

513

514 **Figure legends**

515 **Figure 1. TEM analysis of the brush border.**

516 (A) Representative TEM images of the intestinal lumen at the *C. elegans* developmental stages  
517 indicated.

518 (B-E) Quantification of the lumen perimeter (B) and microvilli density (C), length (D), and  
519 width (E) from TEM images. Histograms show the mean  $\pm$  SEM of the average of 3-13 slices  
520 (B), 3-10 lumen (C) and 6-29 microvilli (D-E) from 3-5 embryos. See Fig. S1 for detailed  
521 measurements of each embryo. Open arrows, nascent microvilli; filled arrows, empty spaces  
522 between microvilli; YA, young adults. n.s., non-significant, \*  $p < 0,05$ , \*\* $p < 0,01$ , \*\*\* $p < 0,001$ ,  
523 unpaired t-test.

524 (F) Transversal view of the brush border in adult worms.

525 (G) The distance between microvilli edges and centres was calculated on 200 microvilli from  
526 (F).

527 **Figure 2. Brush border components are dynamically enriched at the apical membrane**  
528 **during microvilli assembly.**

529 (A-I) Representative images of the apical expression of GFP-tagged MLC-5, PLST-1 and ACT-  
530 5, mNG-tagged ERM-1, IFB-2 and HUM-5, and mVenus-tagged FLN-2 in L1 larvae (A-D)  
531 and 1,5-fold embryos (E-I).

532 (J-K) The absolute apical signal of the indicated markers was measured using photon-counting  
533 detectors (see methods) on at least 10 embryos at the indicated developmental stages and  
534 normalized to the maximum expression for each marker. Data are mean  $\pm$  SEM. (J) shows a  
535 focus on early brush border assembly steps where the maximum intensity was set at the 2-fold-  
536 stage.

537 (L-S) Apical localization of the indicated markers at the 2-fold stage.

538 In all images, arrowheads show the apical plasma membrane of the intestinal cells.



539 **Figure 3. Super-resolution imaging of the brush border.**

540 (A-B) Super-resolution images of ERM-1 endogenously tagged with BFP, mNG and wSc in *C.*

541 *elegans* young adults. (B) represents the normalized intensity profile along a 4  $\mu\text{m}$ -long dashed

542 line, as represented in (A).

543 (C) Super-resolution images of ERM-1::mNG or EXL-1::mNG using a Zeiss LSM880-

544 Airyscan or Random Illumination Microscopy.

545 (D) Transversal super-resolution image of the brush border performed on a *C. elegans* strain

546 endogenously expressing ERM-1::mNG. The red hexagon indicates the putative hexagonal

547 packing of microvilli.

548 (E-I) Super-resolution imaging of the indicated microvilli markers endogenously tagged with

549 mNG (ERM-1, HUM-5), GFP (PLST-1, MLC-5), BFP (EPS-8), mVenus (FLN-2) or wSc

550 (IFB-2). Insert, higher magnification of the zone where ERM-1 and PLST-1 colocalize.

551 Arrowheads show the microvilli base.

552 (J-K) Super-resolution images of the brush border in 2-fold embryo and L2 larvae co-expressing

553 EPS-8::BFP, ERM-1::mNG and IFB-2::wSc. Left TEM images show the shape of the brush

554 border at the corresponding developmental stage. Right histograms correspond to the signal

555 intensity profile of the three markers along the line depicted on the pictures.

556 All the pictures were performed in young adult worms. Unless mentioned, scale bars are 2 $\mu\text{m}$ .

557 **Figure 4. Brush border components dynamics during microvilli assembly.**

558 (A-B) ERM-1::mNG was bleached in a 1,5-fold embryo and an adult worm, and fluorescence  
559 recovery was observed every 30 s.

560 (B-E) Quantification of the signal recovery after bleaching of ERM-1::mNG (B), EPS-8::mNG  
561 (C), ACT-5::GFP (D) and IFB-2::mNG (E), measured every 30 s on 5-11 worms at the indicated  
562 developmental stages. Thin lines represent the mean  $\pm$  SEM of signal recovery. Bold lines  
563 represent one-phase association non-linear regression fitting curves.

564 (F-G) The mobile fraction of the indicated markers at the Comma, 1,5-fold, L1 larva and adult  
565 stages was calculated from the FRAP data from (B-E). Histogram show the mean  $\pm$  SEM.

566 The difference between variance was calculated using ANOVA, \* $p < 0,05$ , \*\* $p < 0,01$ .

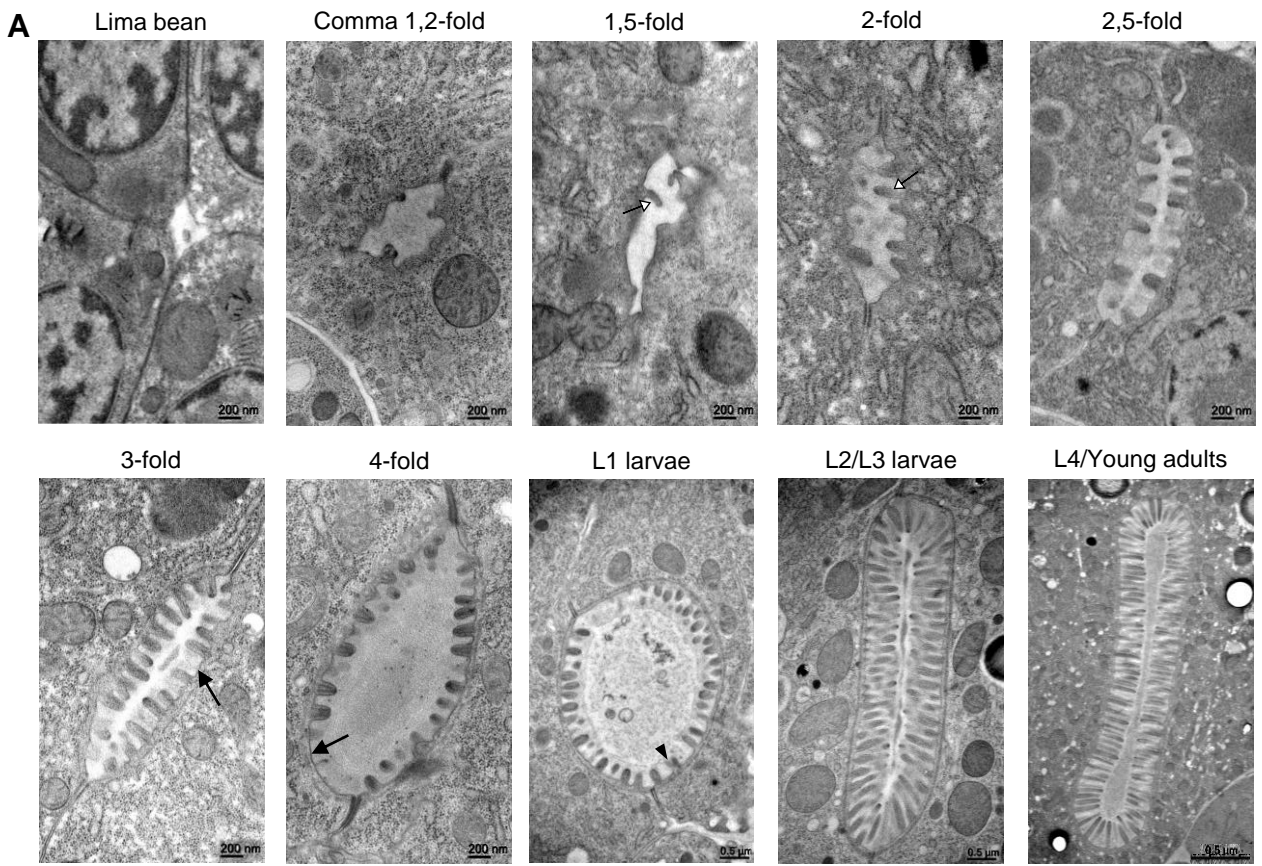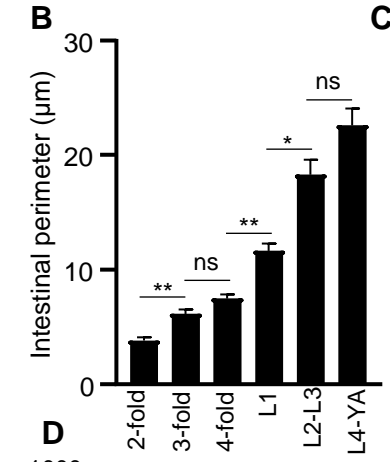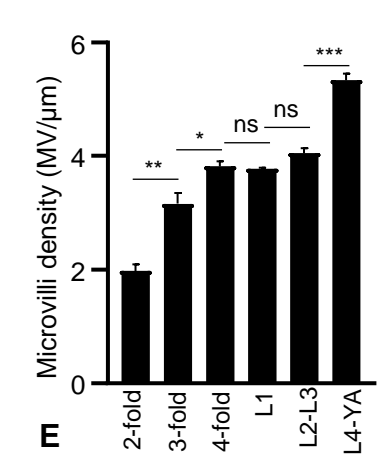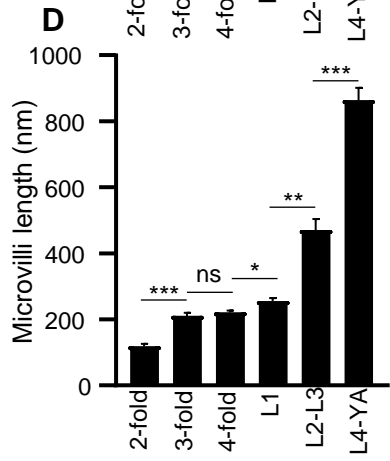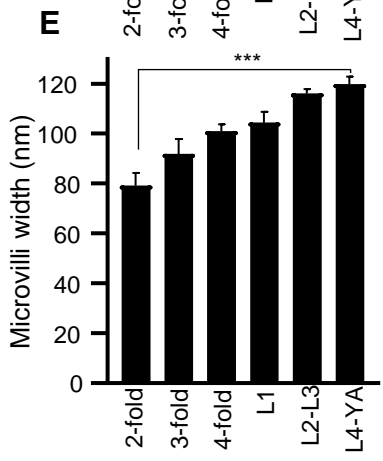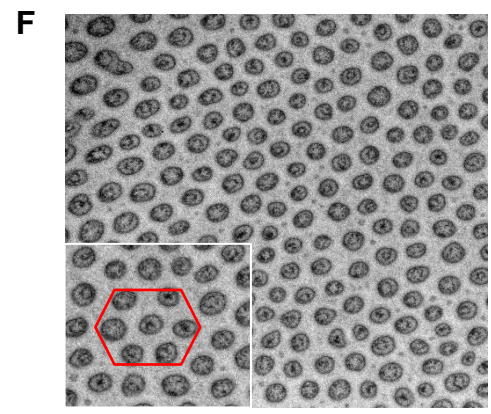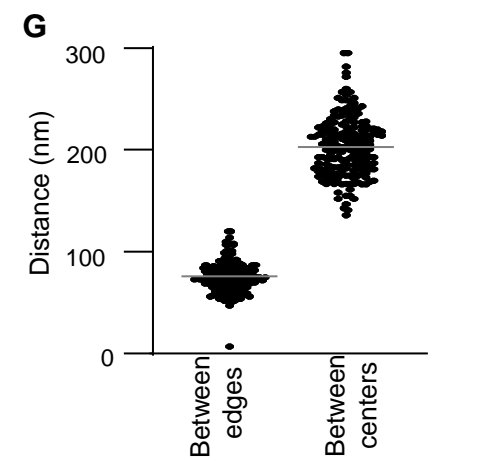

**Figure 1**

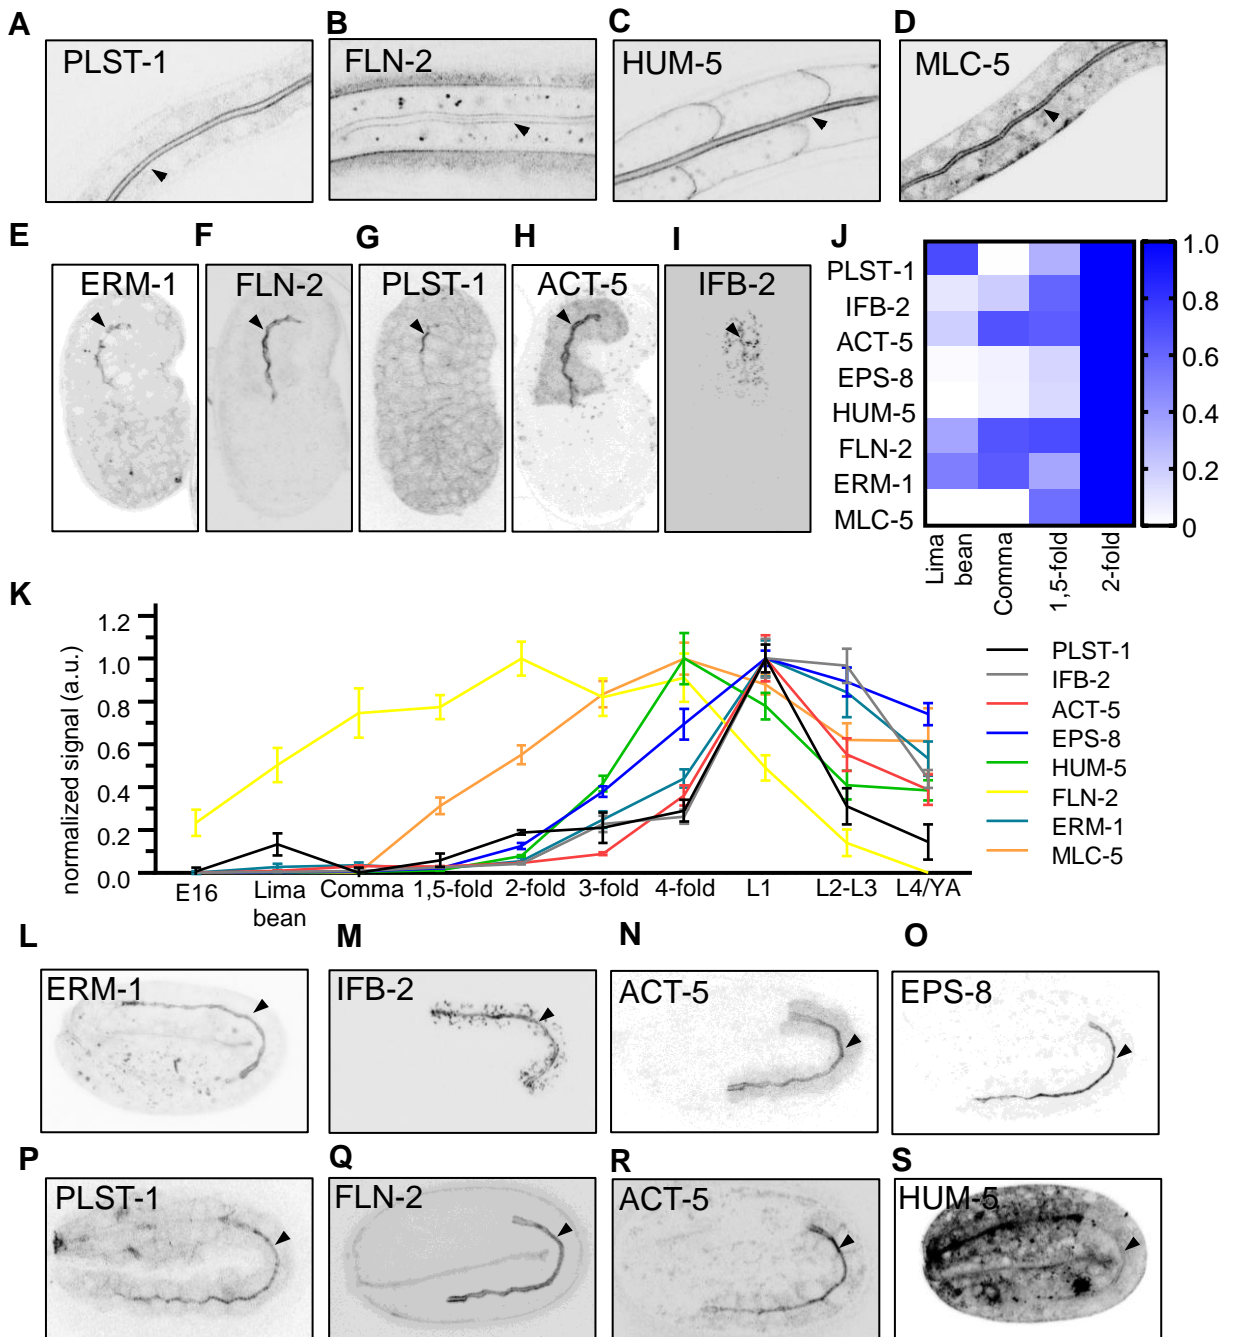

**Figure 2**



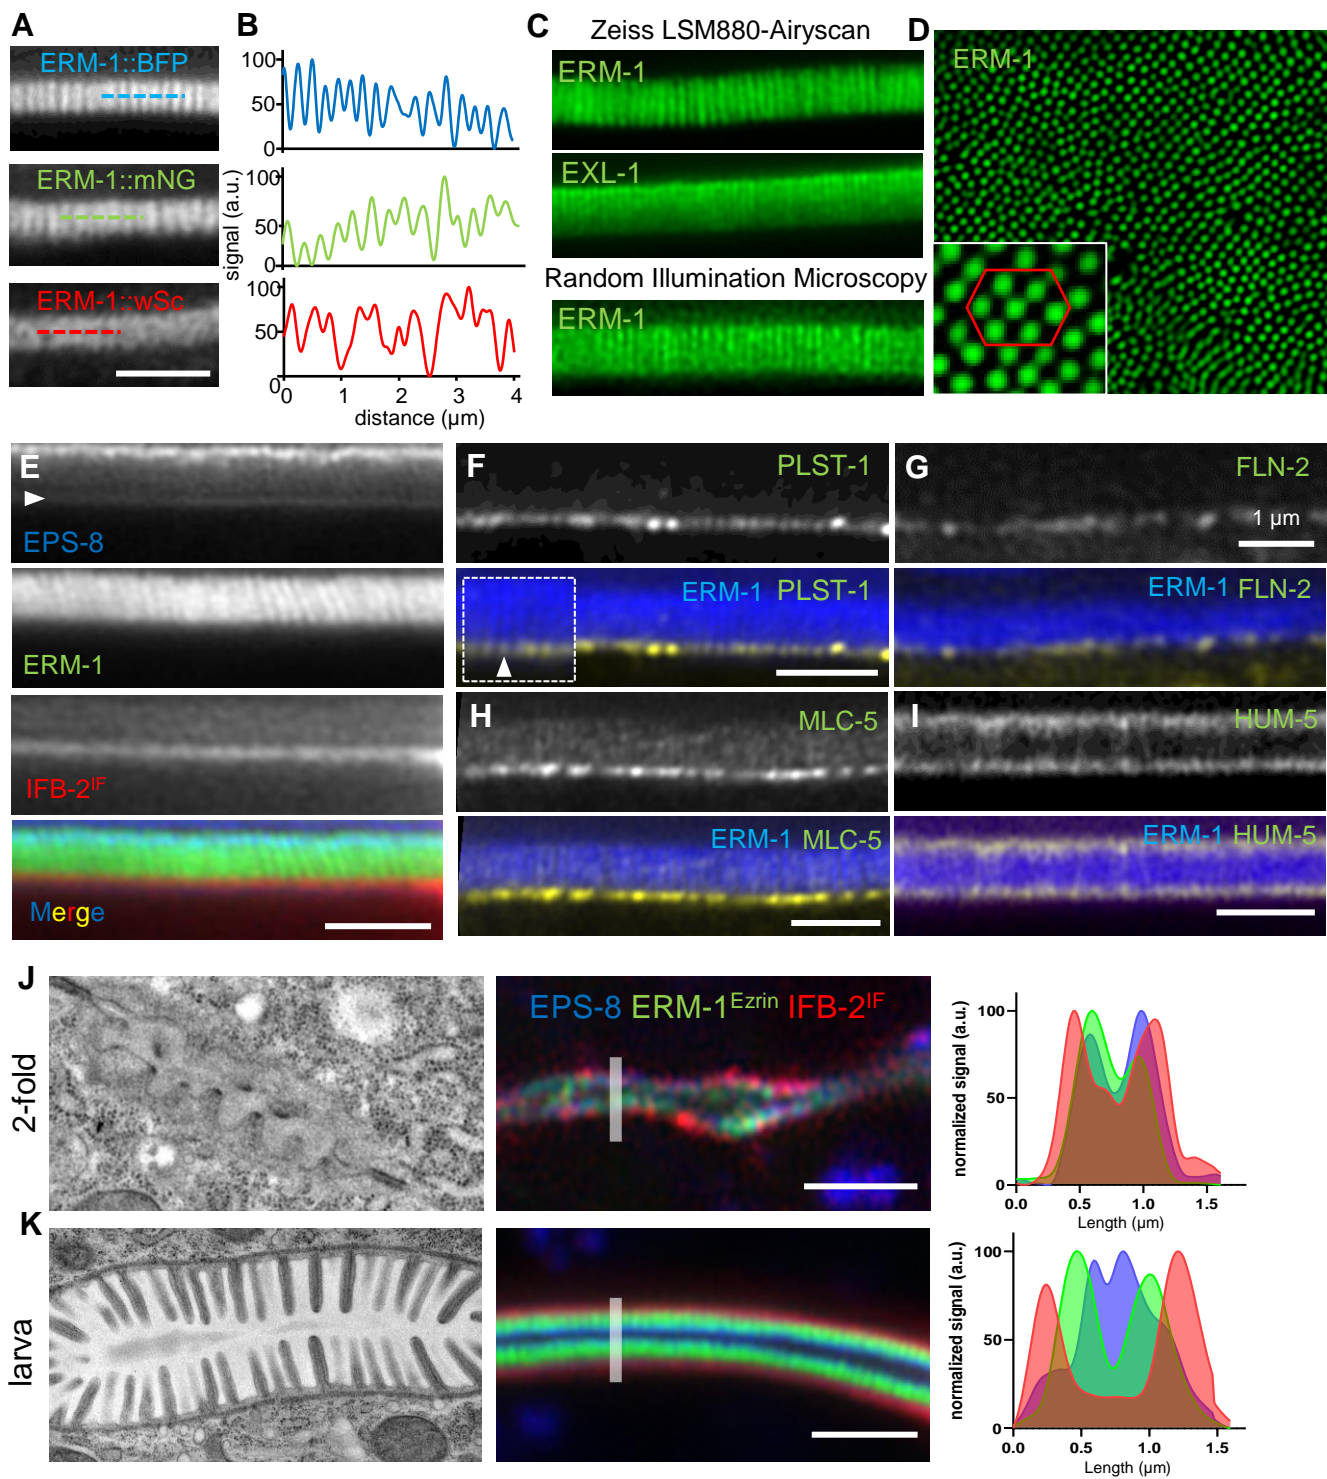

**Figure 3**

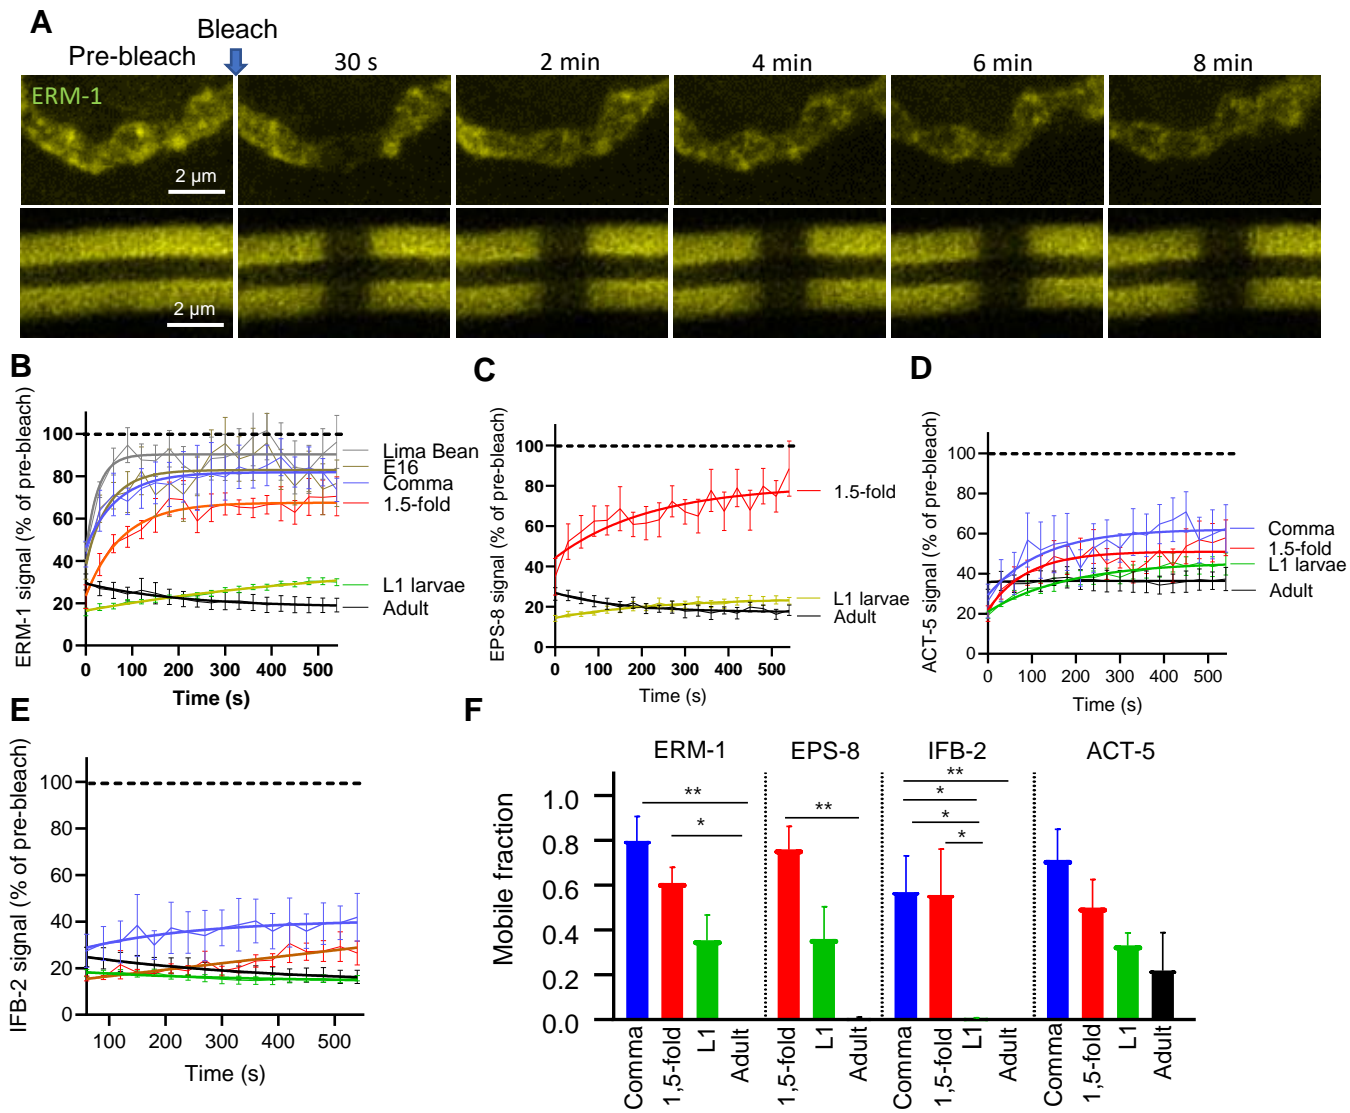

**Figure 4**

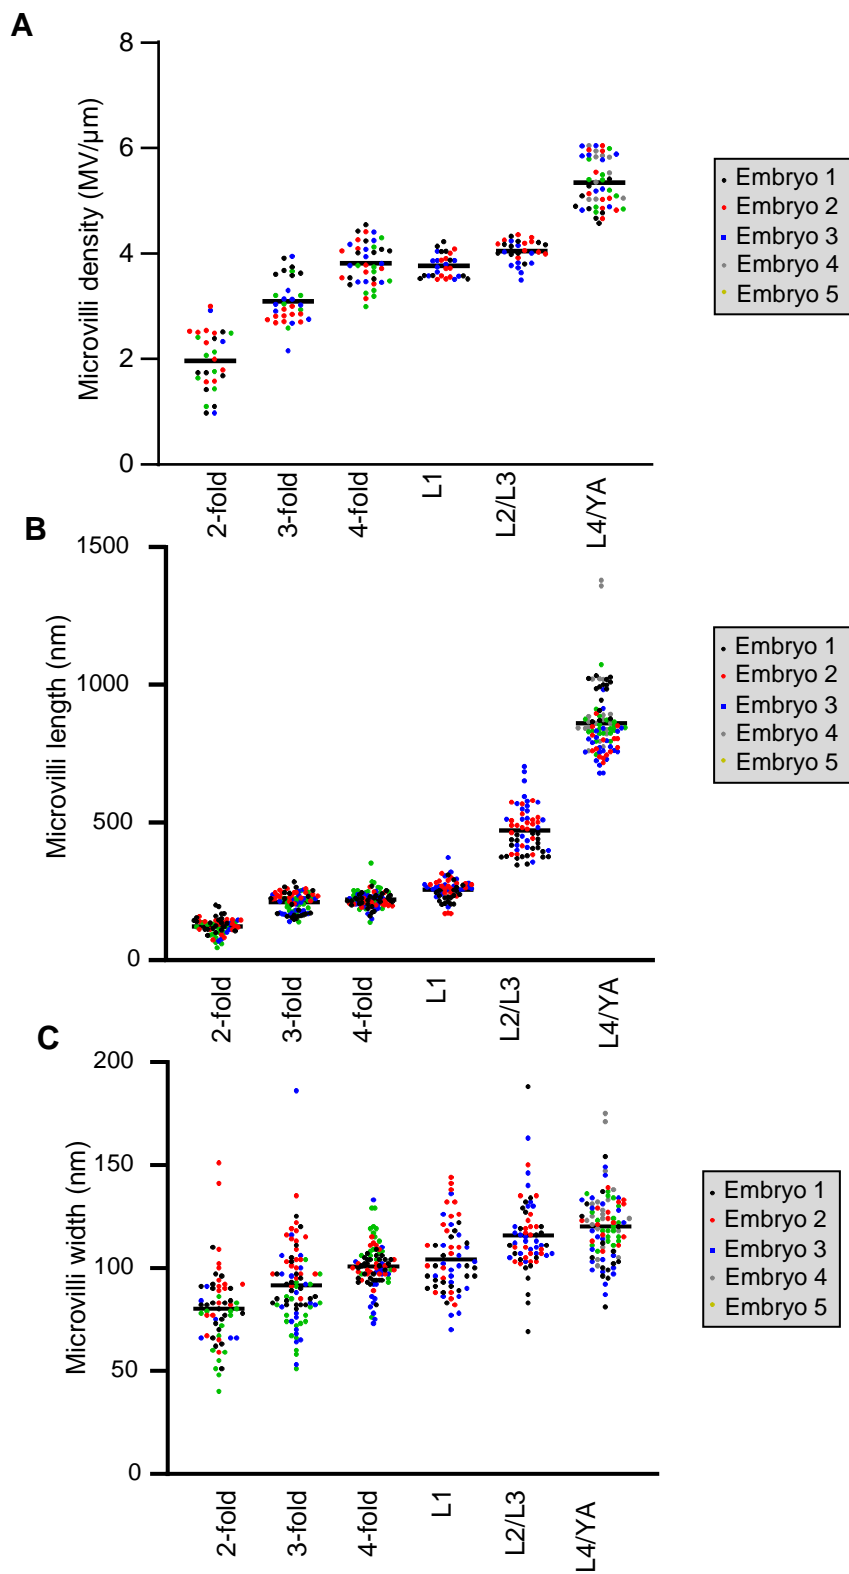

**Figure S1. Individual values of brush border measurements by TEM.**

Colorized dots represent individual worms at the indicated developmental stages. Bar is the grand mean of all the measurements. Microvilli density was measured on 3-13 slices/worm, microvilli length and width on 6-29 microvilli/worm.

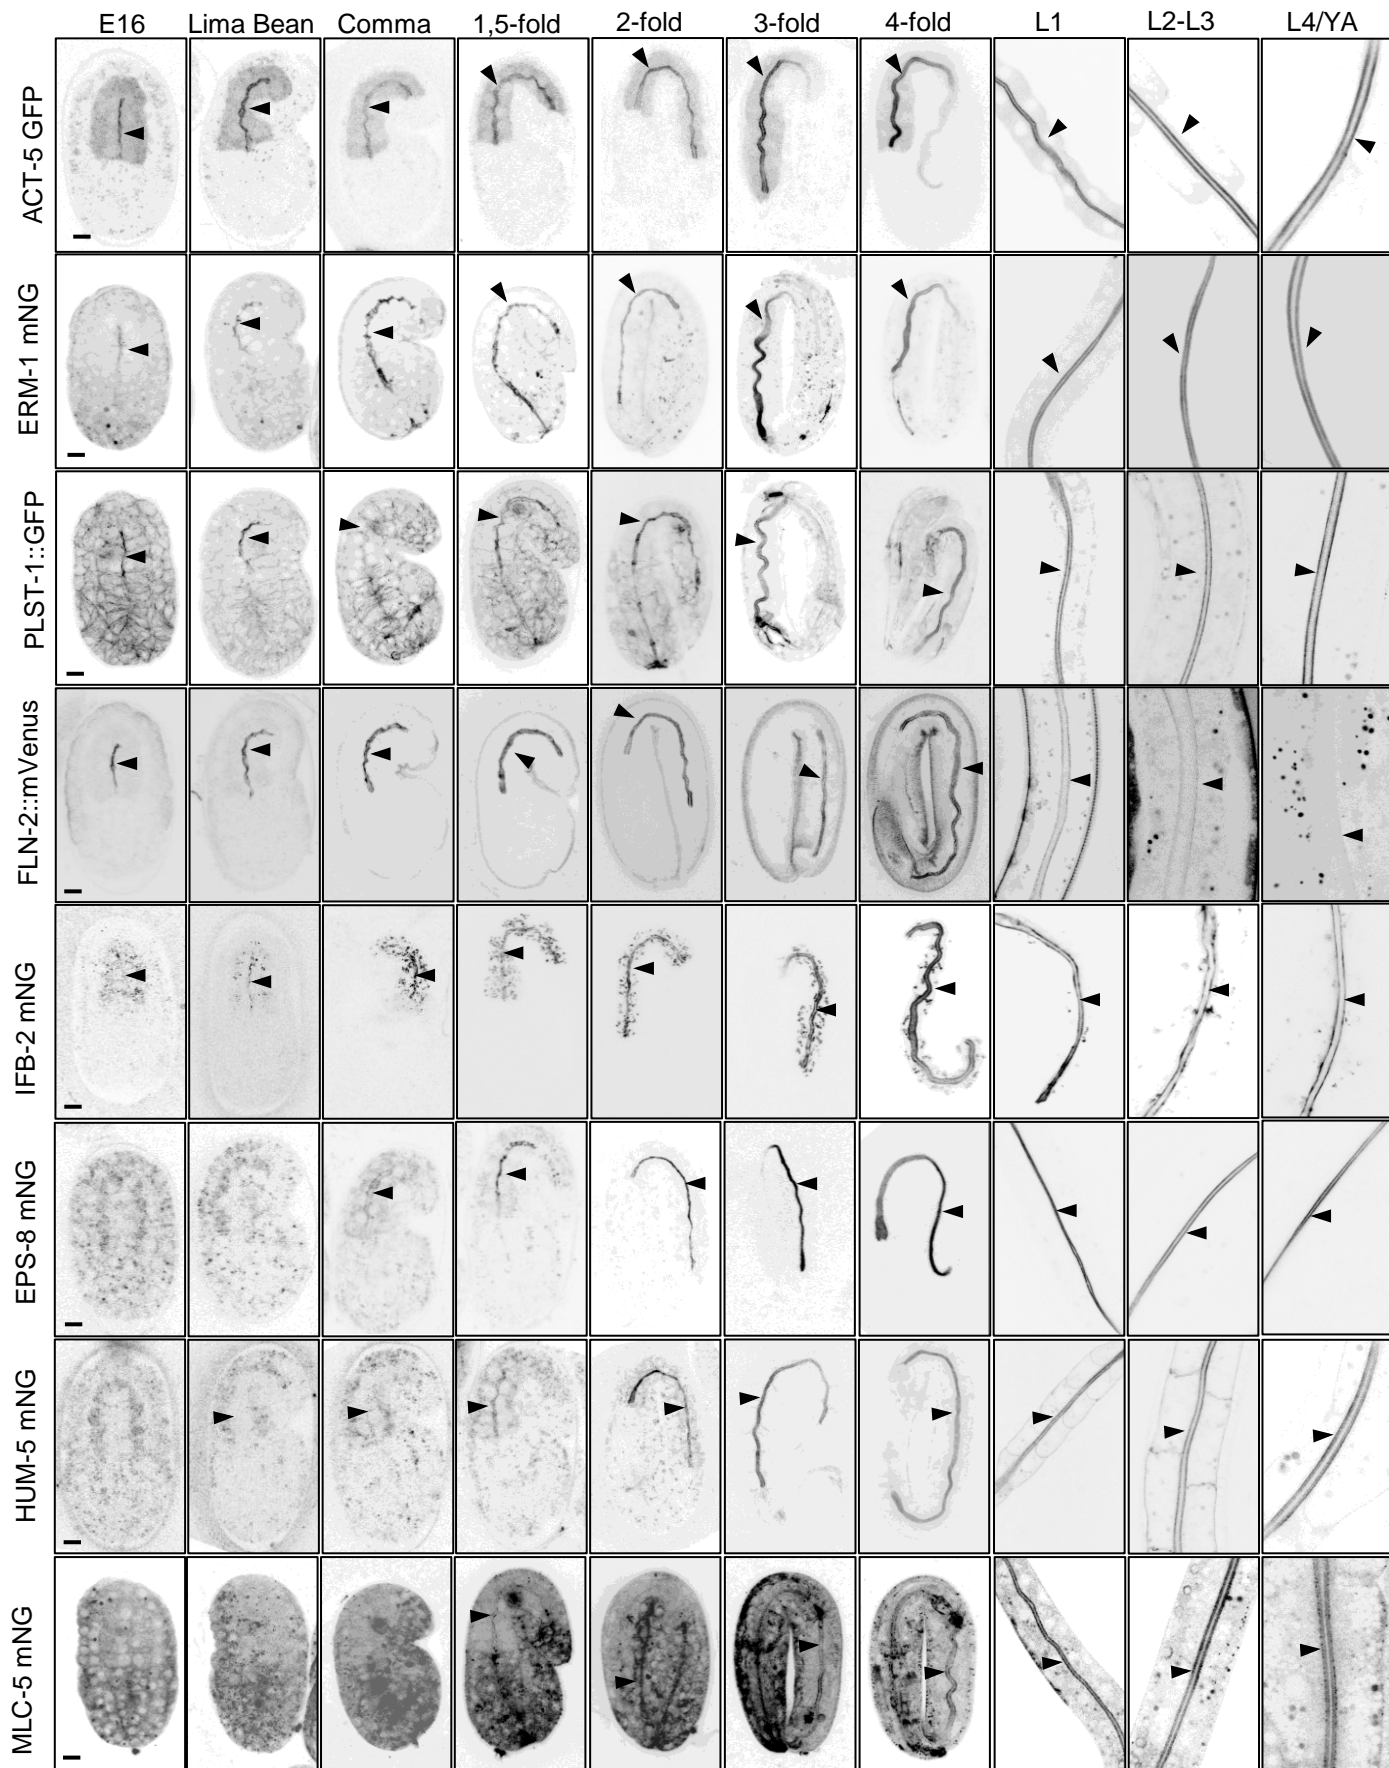

**Figure S2. Systematic analysis of brush border markers during *C. elegans* development.** Representative confocal images of the endogenously tagged markers indicated (except ACT-5::GFP). Arrowheads show the intestinal cells apical PM. Scale bar is 5  $\mu$ m.



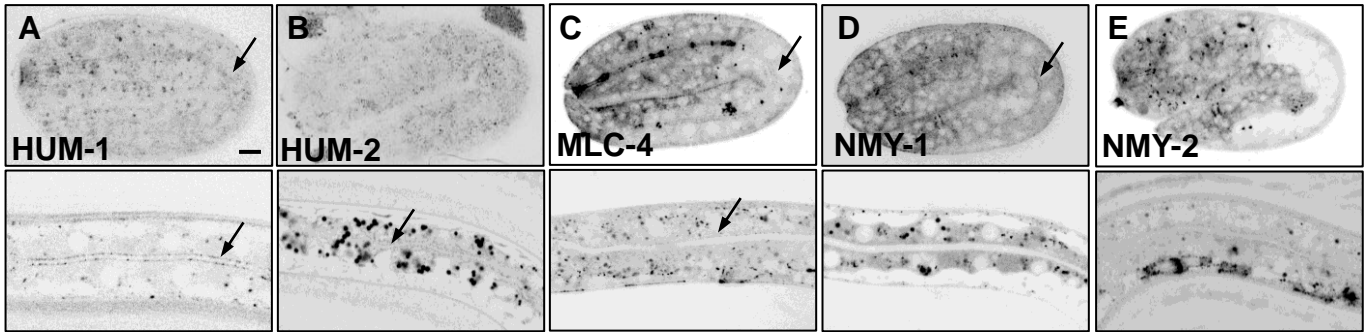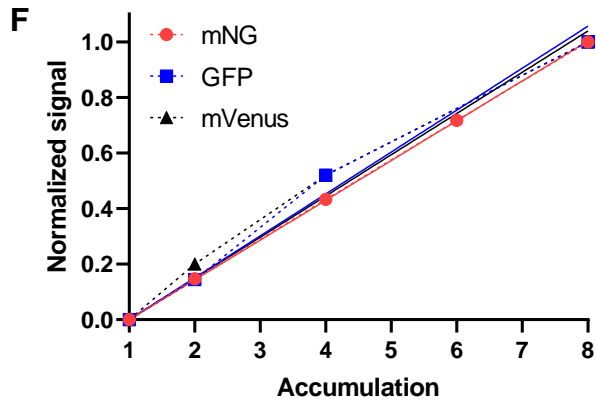

**Figure S3. Systematic analysis of brush border markers during *C. elegans* development.**

(A-E) Representative confocal images of *C. elegans* strains expressing endogenously tagged versions of the indicated markers, which showed no apical accumulation during *C. elegans* intestine development. (F) Control of the quantitative assessment of brush border markers arrival at the apical PM. Accumulation of ERM-1::mNG, PLST-1::GFP and FLN-2::mVenus signal linearly increases with the image accumulation. Scale bar, 5  $\mu$ m.

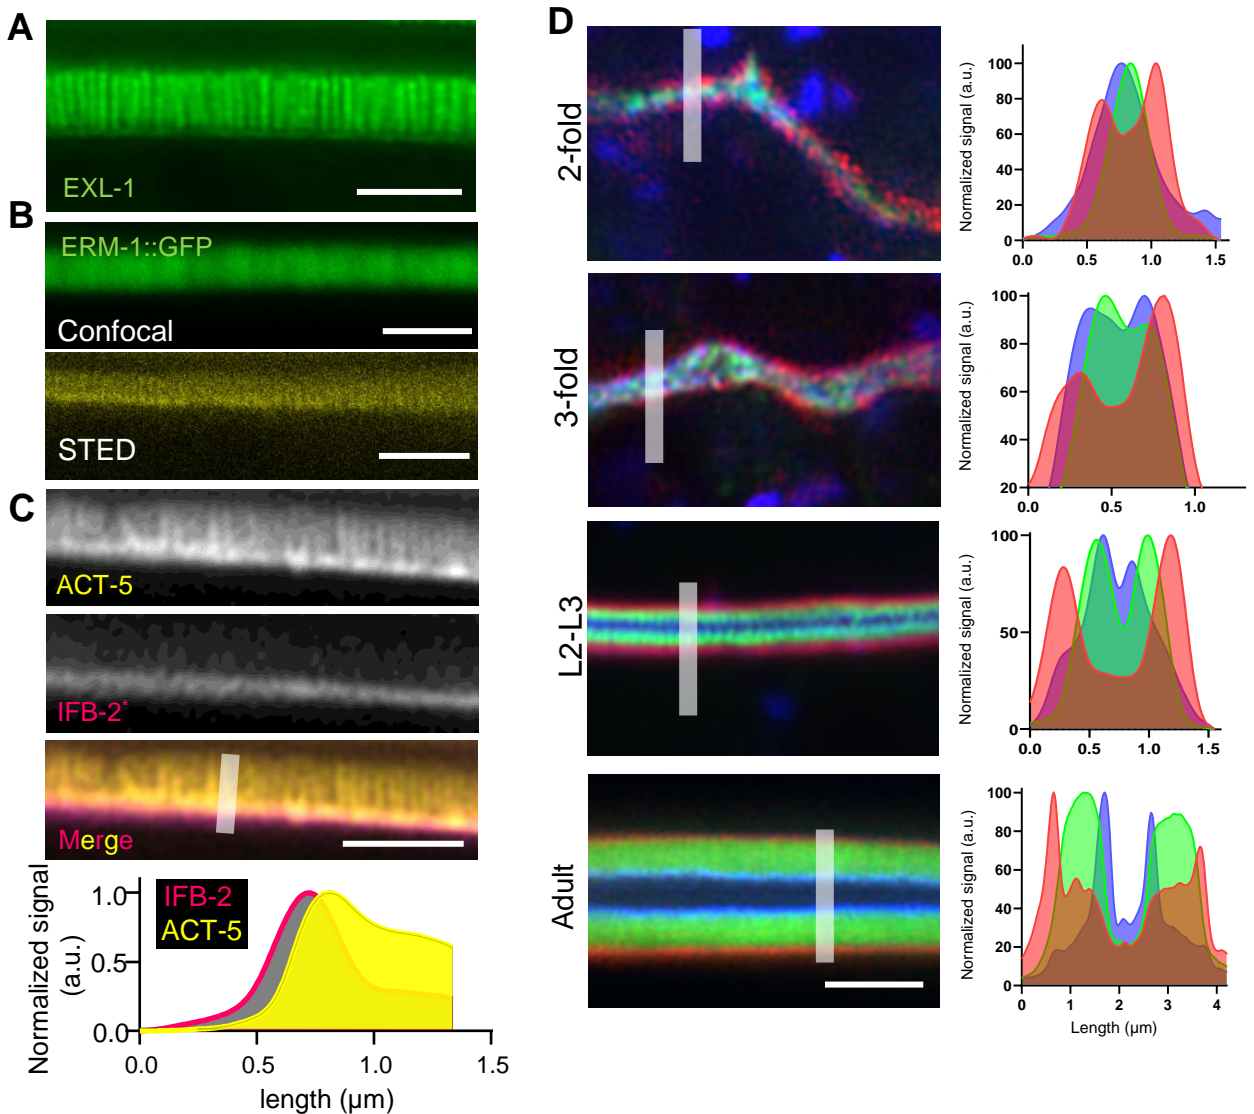

**Figure S4. Super-resolution imaging of brush border markers *in vivo*.** (A) Representative confocal image of exogenously expressed EXL-1::GFP. (B) ERM-1::GFP was imaged in adult worms using the indicated microscopes. (C) Super-resolution images of a *C. elegans* adults co-expressing ACT-5::GFP and IFB-2::wSc. Bottom panel shows a normalized intensity profile along the line depicted in grey. (D) Representative images of the localization of endogenously tagged EPS-8::BFP, ERM-1::mNG and IFB-2::wSc in *C. elegans* at the indicated developmental stages. Right panels show an intensity profile of the three markers along the line depicted in left panels. Scale bars,  $2\mu\text{m}$ .

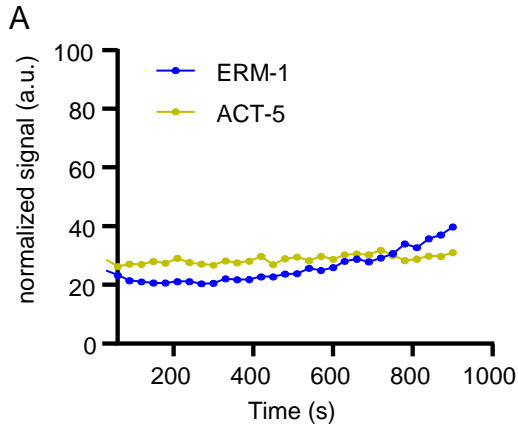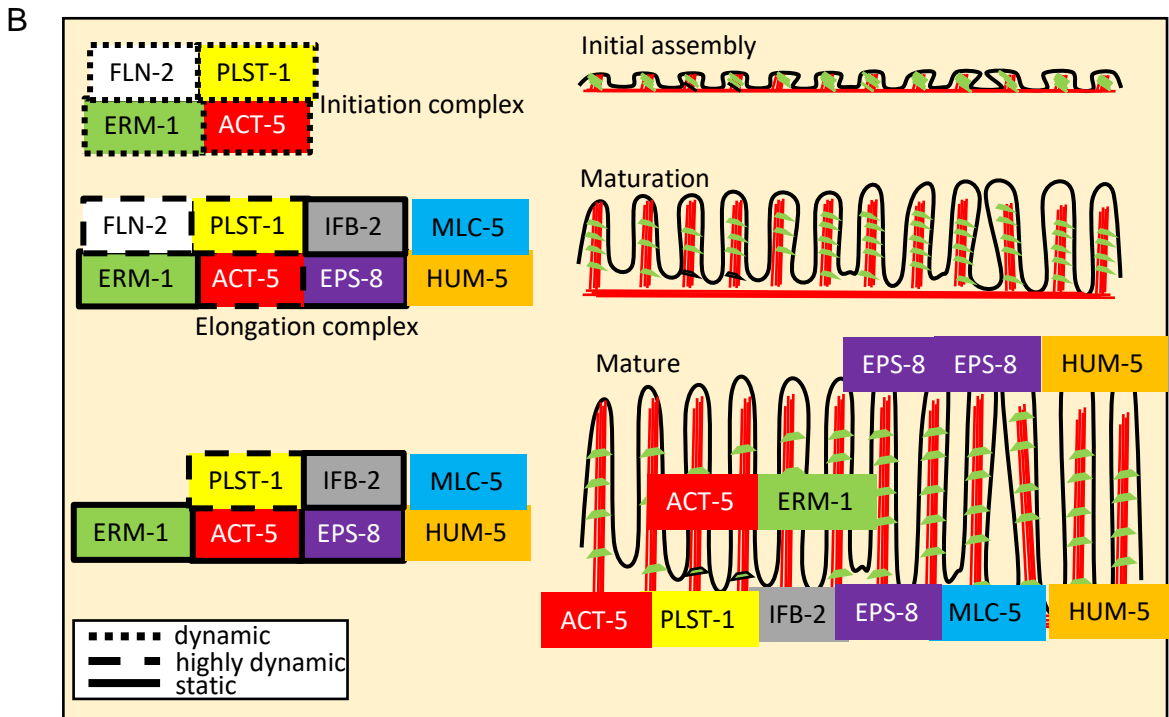

**Figure S5. Dynamic recruitment of brush border components.**

(A) Longer measurement of ERM-1 and ACT-5 dynamics in adult worms. The curves show the recovery of ERM-1::mNG and ACT-5::GFP signal every 30 s after photobleaching, measured for an extended time. (B) Model of brush border assembly *in vivo* in *C. elegans*. Microvilli are built from a preformed *initiation complex* and assemble through the dynamic recruitment of brush border components, which become highly stable in the mature brush border.

| Strain | Markers             | Genotype                                                                    | Reference                                |
|--------|---------------------|-----------------------------------------------------------------------------|------------------------------------------|
| FBR 96 | MLC-4               | mlc-4(jme04[mlc-4::eGFP+loxP])III                                           | Francois Robin lab                       |
| FBR140 | MLC-5               | mlc-5(jme09[GFP^3xFLAG::mlc-5])III                                          | Francois Robin lab                       |
| FBR222 | FLN-2               | fln-2::venus                                                                | Francois Robin lab                       |
| FL274  | ERM-1, IFB-2        | erm-1(bab59[erm-1::mNG^SEC^3xFlag]) I ; ifb-2(bab142[ifb-2::wSc]) II        | Bidaud-Meynard et al., Development, 2019 |
| FL290  | EPS-8               | eps-8(bab140[eps-8::mNG]) IV                                                | This study                               |
| FL378  | ERM-1               | erm-1(bab59[erm-1::mNG^3xFlag]) I                                           | Bidaud-Meynard et al., Development, 2019 |
| FL379  | ERM-1               | bab64[erm-1::wrmSc^3xFlag] I                                                | Bidaud-Meynard et al., Development, 2019 |
| FL383  | EPS-8, ERM-1, IFB-2 | eps-8(bab140[eps-8::mNG]) IV ; erm-1(bab59[erm-1::mNG^SEC^3xFlag]) I; IFB-2 | This study                               |
| FL384  | ERM-1               | erm-1(bab167[erm-1::degron-tagBFP2])                                        | This study                               |
| FL385  | IFB-2               | ifb-2(bab153[ifb-2::mNG]) II                                                | This study                               |
| FL386  | ERM-1, PLST1        | erm-1(bab167[erm-1::degron-tagBFP2]) ; plst-1(msn190[plst-1::gfp]) IV       | This study                               |
| FL387  | ERM1, HUM5          | erm-1(bab167[erm-1::degron-tagBFP2]) ; hum-5(bab189[hum-5::mNG])            | This study                               |
| FL388  | ERM-1, MLC5         | erm-1(bab167[erm-1::degron-tagBFP2]) ; mlc-5(jme09[GFP^3xFLAG::mlc-5])III   | This study                               |
| FL586  | ERM-1, FLN-2        | erm-1(bab167[erm-1::degron-tagBFP2])                                        | This study                               |
| LP162  | NMY-2               | nmy-2(cp13[nmy-2::GFP + LoxP]) I                                            | CGC                                      |
| LP462  | MRCK-1              | mrck-1(cp189[mrck-1::GFP::3xFlag]) V                                        | CGC                                      |
| MCP111 | PGP-1               | pgp-1(bab111[mNG^3xFlag::pgp-1]) IV                                         | Bidaud-Meynard et al., Development, 2019 |
| MCP184 | HUM-2               | hum-2(bab184[hum-2::mNG])                                                   | This study                               |
| MCP189 | HUM-5               | hum-5(bab189[hum-5::mNG])                                                   | This study                               |
| MCP223 | EXL-1               | exl-1(bab223[exl-1::mNG])                                                   | This study                               |
| ML2540 | NMY-1               | nmy-1(mc82[nmy-1::gfp]) X.                                                  | Vuong-Breder TTK, et al. eLife 2017      |
| OH2211 | EXL-1               | otEx1184 [exl-1p::exl-1::GFP + rol-6(su1006)]                               | CGC                                      |
| QQ226  | HUM-1               | hum-1(cv21[hum-1::RFP]) I                                                   | CGC                                      |
| RZB213 | PLST-1              | plst-1 (msn190[plst-1::gfp]) IV                                             | Ding WY et al J Cell Biol 2017           |
| VJ268  | ACT-5               | fgEx12 (act-5p::act-5::gfp)                                                 | Zhang et al., 2012                       |

**Table S1. *C. elegans* strains used in this study.**
